# Supplementary material for: How do layered double hydroxides evolve? Firstin situinsights into their synthesis processes
Source: Royal Society of Chemistry journal article supplement (doi:10.1039/d2ra05269e), 2022-01-01
Supplement: d2ra05269e1.pdf [file d2ra05269e1.pdf]

## How do layered double hydroxides evolve? First *in situ* insights into their synthesis processes

G. Doungmo,<sup>a,b</sup> A. F. Morais,<sup>c</sup> D. Mustafa,<sup>c</sup> T. Kamgaing,<sup>b</sup> E. Njanja,<sup>b</sup> M. Etter,<sup>d</sup> I. K. Tonlé<sup>b\*</sup>  
and H. Terraschke<sup>a\*</sup>

a. Institut für Anorganische Chemie, Christian-Albrechts-Universität zu Kiel, Max-Eyth-Str. 2,  
24118 Kiel, Germany. E-mail: hterraschke@ac.uni-kiel.de.

b. Laboratory of Noxious Chemistry and Environmental Engineering, University of Dschang  
P.O. BOX: 67 Dschang, Cameroon

c. Instituto de Física da Universidade de São Paulo, São Paulo 05508-090, Brazil

d. DESY Photon Science, Notkestr. 85, 22607 Hamburg, Germany.

### Electronic supplementary information

## Contents

|                                                                |    |
|----------------------------------------------------------------|----|
| 1. Experimental Setups.....                                    | S2 |
| 2. Influence of the reactant concentration .....               | S4 |
| 3. Influence of the temperature .....                          | S5 |
| 4. Simultaneous addition of metallic and basic solutions. .... | S6 |
| 5. Addition of metallic to basic solution .....                | S6 |

# 1. Experimental Setups

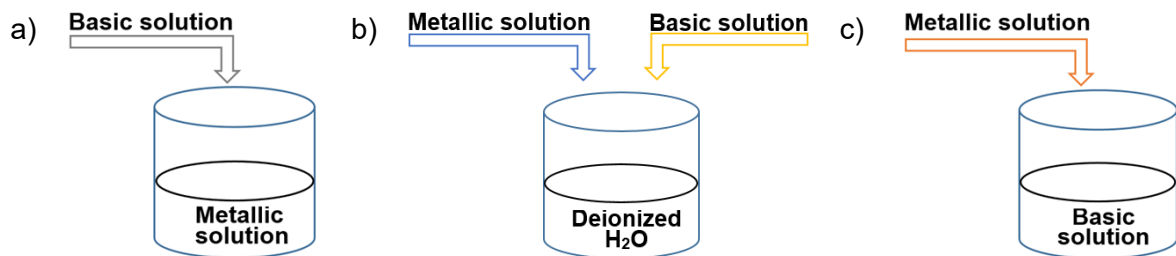

**Figure S1:** Schematic representation of LDH synthesis approach A (left), approach B (middle) and approach C (right).

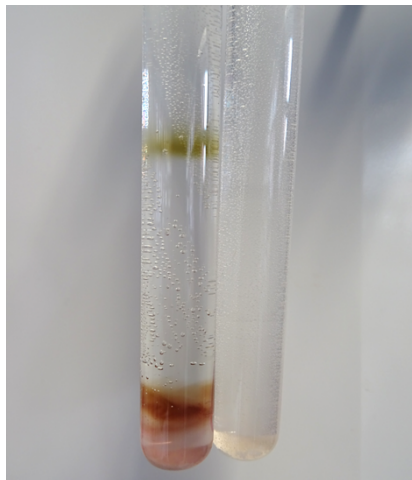

**Figure S2:** Brown ring test (sample S<sup>B</sup>) for detection of nitrate ions in the supernatant solution.

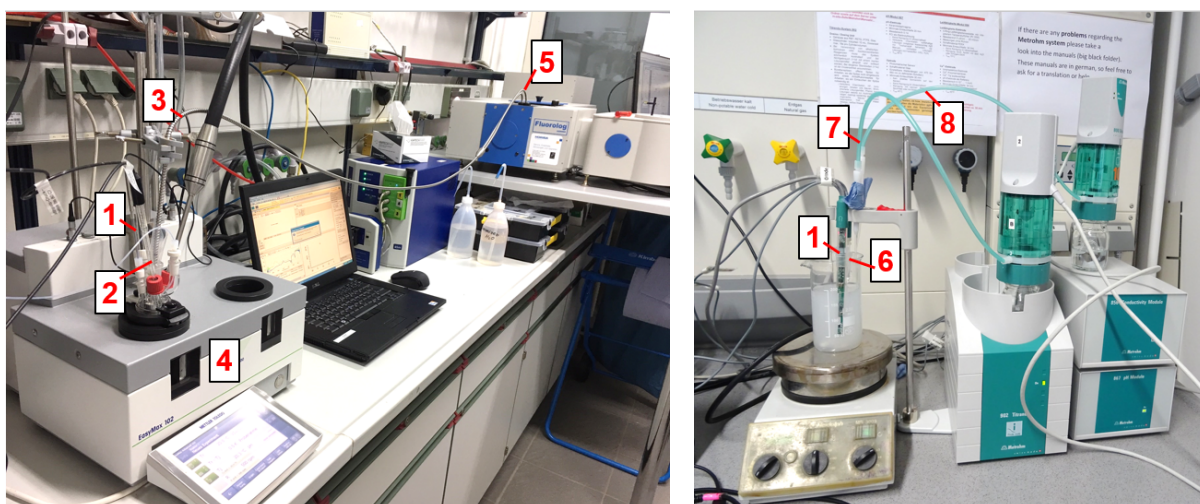

**Figure S3.** Left: Setup I containing a pH sensor (1), temperature sensor (2), optical fiber for light scattering measurements (3), jacket for temperature control (4) and luminescence spectrometer (5). Right: Setup II showing in addition the turbidity sensor (6), dosing system for metallic (7) and basic (8) solutions.

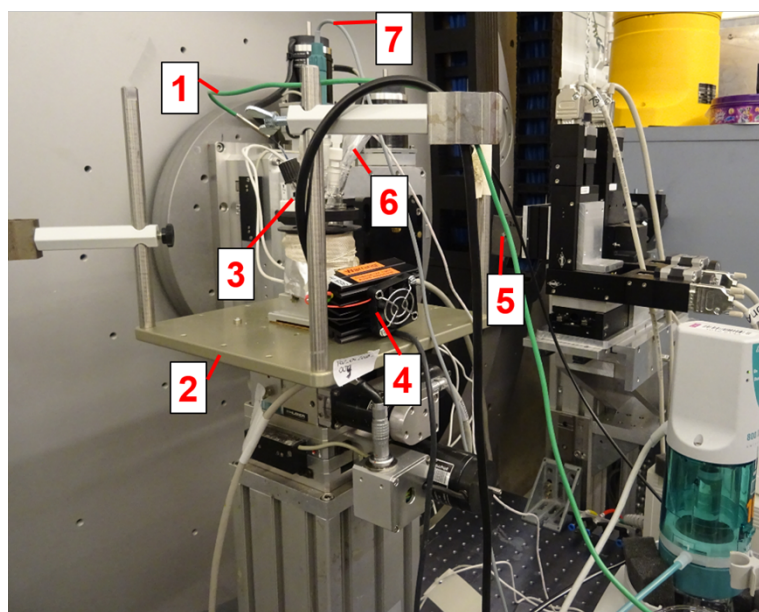

**Figure S4:** Setup II used at the P02.1 PETRA III beamline for simultaneous measurements of *in situ* X-ray diffraction (XRD) analysis and light scattering showing the temperature sensor (1), reactor holder (2), glass reactor (3), external UV excitation light source (4), X-ray beam (60 keV) (5), dosing system (6) and pH sensor (7).

## 2. Influence of the reactant concentration

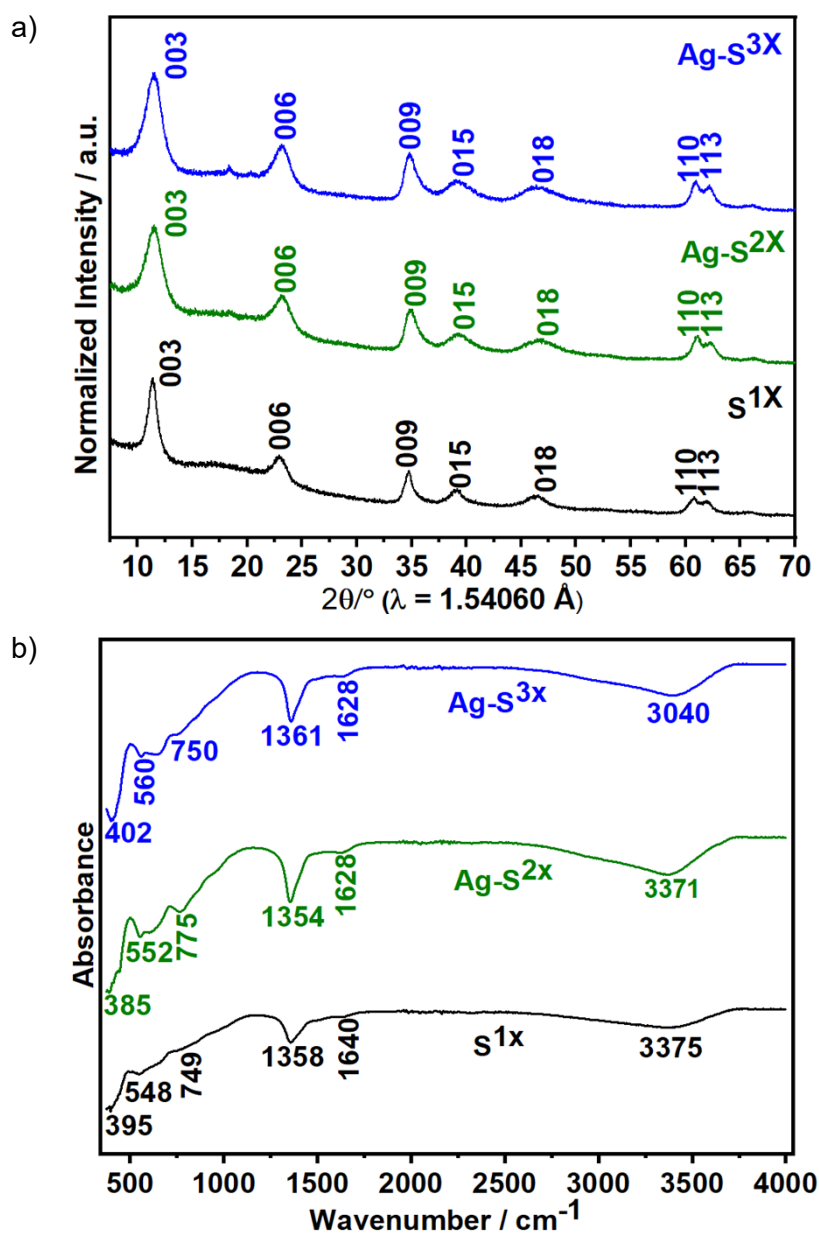

**Figure S5:** a) *Ex situ* XRD patterns b) and Fourier-transform infrared spectroscopy (FTIR) spectra of the samples synthesized with different reactant concentrations.

### 3. Influence of the temperature

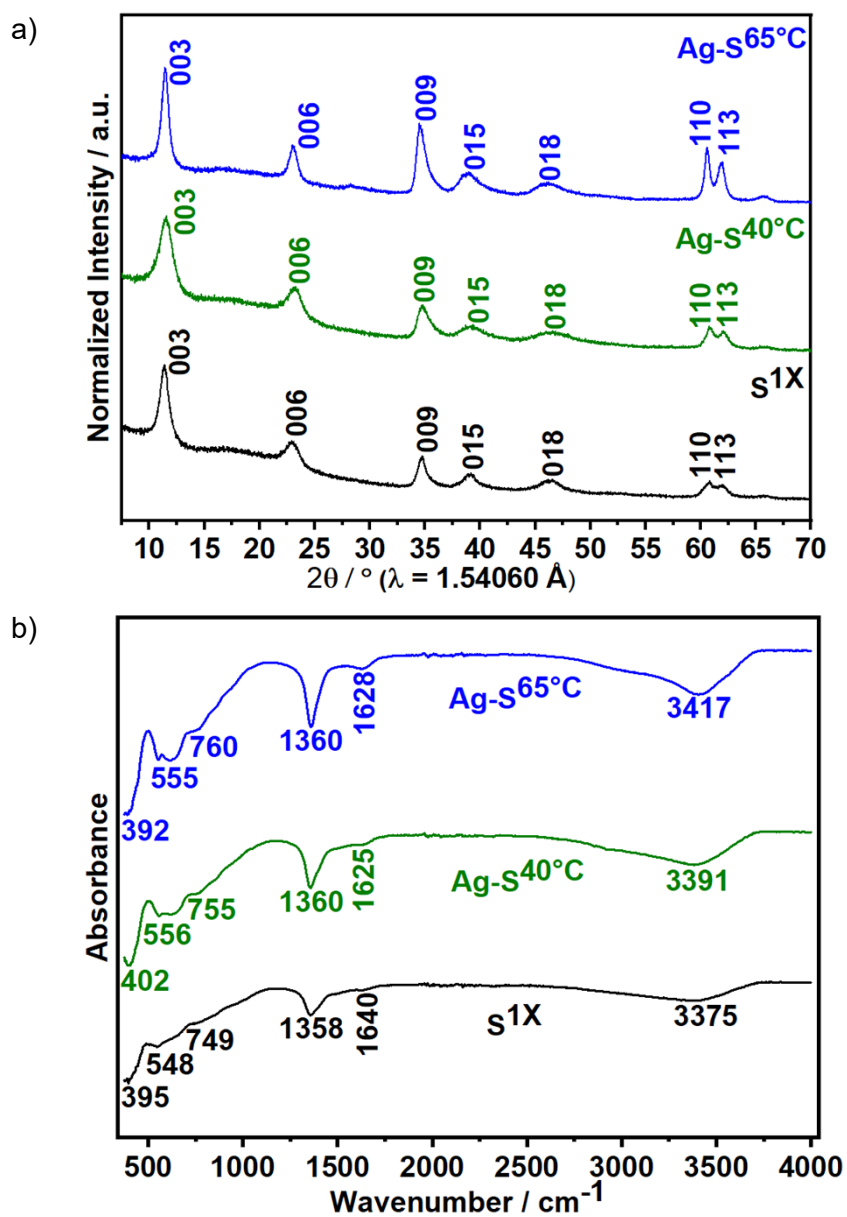

**Figure S6:** *Ex situ* XRD patterns (top) and FTIR spectra (bottom) performed on samples synthesized at different temperatures.

#### 4. Simultaneous addition of metallic and basic solutions.

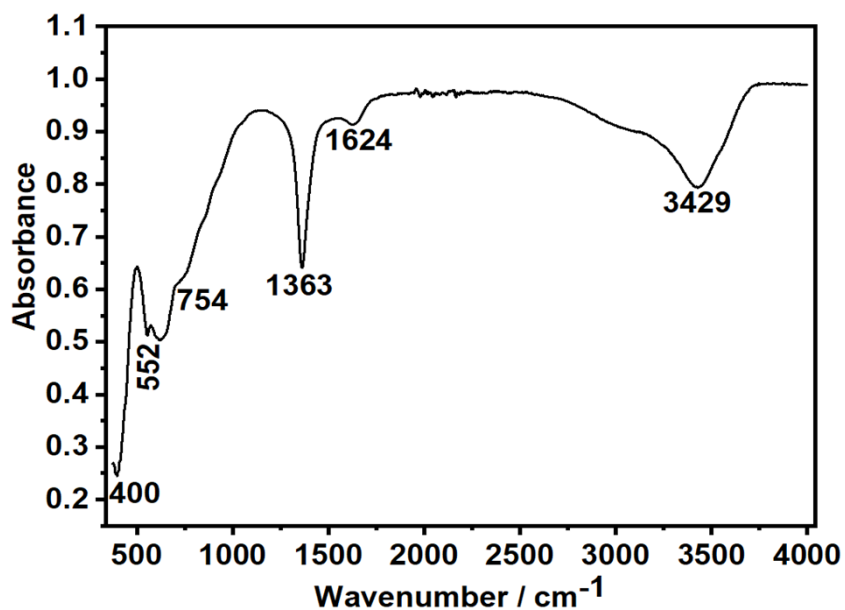

Figure S7. FTIR analysis of sample S<sup>B</sup>.

#### 5. Addition of metallic to basic solution

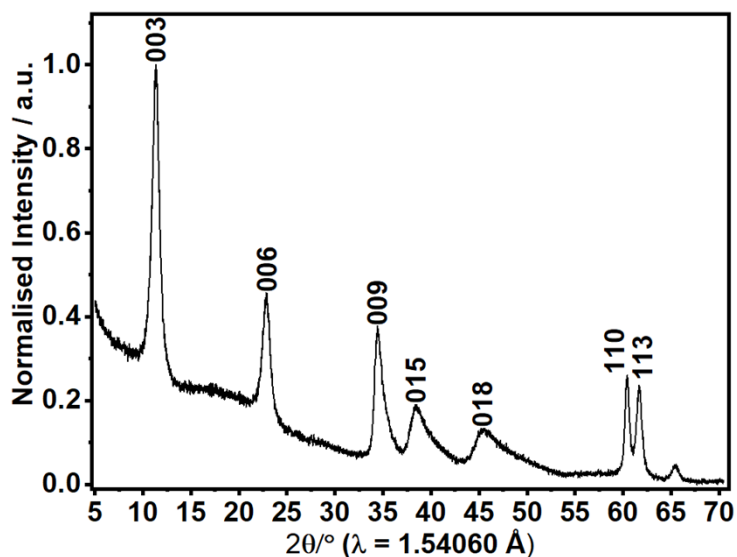

Figure S8. *Ex situ* XRD performed after the synthesis of sample S<sup>C</sup>.
